# Supplementary material
Source: HighWire-hosted journal article supplement (https://www.ghspjournal.org/highwire/filestream/1572/field_highwire_adjunct_files/0/GHSP-D-14-00029-Rose-Wood-Supplementary-Appendix.docx)
Supplement: GHSP-D-14-00029-Rose-Wood-Supplementary-Appendix.docx [file GHSP-D-14-00029-Rose-Wood-Supplementary-Appendix.docx]

**SUPPLEMENTARY APPENDIX.** Codebook for the Master Health Facility List (MHFL) in Haiti

The table shows the variables contained in the codebook used to generate the MHFL in Haiti. The codebook was created by the Office of Foreign Disaster Assistance, U.S. Agency for International Development building upon the codes created by the Institut Haitien de Statistique et d’Informatique*.*

| **Variable** | | Description | | **Value Description** | | | |
| --- | --- | --- | --- | --- | --- | --- | --- |
| **Facility Identification (ID)** | | | | | | | |
| **RegionID** | | Regional ID number assigned by the MSPP | | Values 1-10; Corresponds with *Departéments* | | | |
| **DistrictID** | | District ID number | |  | | | |
| **CommuneID** | | ID number assigned to each Commune by the MSPP | |  | | | |
| **CodeCommun** | | ID number created by joining RegionID and the CommuneID | |  | | | |
| **SanteID** | | ID number assigned locally to each health facility within a Commune | | Starts at 1 for each Commune | | | |
| **HealthC_ID** | | Unique ID number for each health facility identified in Haiti. | | GENERAL FORMULA:  CommuneCode * 10000 +  SanteID  IF there is no SanteID (i.e. SanteID = 0), add 9000 to this value and number consecutively within each Commune.  All HealthC_IDs are unique but many can no longer be generated following this rule. One reason is that the region, commune and district IDs may have changed after incorporating the new information from MSPP_2010. Since the HealthC_ID is dependent upon location of the facility, a HealthC_ID may need to change due to a location change. In this case, the old HealthC_ID will be put in the Comments column of that health facility and a notification of the changed HealthC_ID will be posted upon release of a new version.  New additions to the database follow Rule (1) since they have no SanteID. | | | |
| **Variable** | | Description | | **Value Description** | | | |
|  | | **Facility ID continued** | |  | | | |
| **PCode** | | MSPP code for facilities | | Codes up to 81,202: Original MSPP codes.  Codes 95,000 and consecutively higher: Temporary PCodes assigned to records if no MSPP code was assigned. | | | |
| **Geographic Location of Facility** | | | | | | | |
| **X_DDS** | | Latitude in decimal degrees, WGS84 | | This value will always be positive | | | |
| **Y_DDS** | | Longitude in decimal degrees, WGS84 | | This value will always be negative | | | |
| **Accuracy** | | Comment on accuracy of value | | Describe how the coordinates were located  Examples:  Commune centroid  Handheld GPS  Google Earth | | | |
| **Address** | | Address of facility | |  | | | |
| **Departément** | | Name of department | |  | | | |
| **DistrictNom** | | District Name | |  | | | |
| **Commune** | | Commune Name | |  | | | |
| **Facility Name** | | | | | | | |
| **NomInstitu** | | Name of health facility from original databases | |  | | | |
| **Fac_NameEn** | | English name of facility | |  | | | |
| **Fac_NameFr** | | French name of facility | | Official name of health facility according to the MSPP | | | |
| **Fac_NameKr** | | Creole/Kreyol name of facility | |  | | | |
| **Variable** | | Description | | **Value Description** | | | |
| **Facility Information (Info)** | | | | | | | |
| **Organisat** | | Organization operating the facility (from MSPP database) | |  | | | |
| **Categorie** | | Category of facility from MSPP | | C/S – Health center (Centre de Sante)  CAL – Health center with beds  CSL – Health center without beds  DISP – Dispensary  F Hospital ­­– Field Hospital  HOP – Hospital  HOPSpec – Specialized Hospital  MOB – Mobile Facilities  TEMP – Temporary Facilities  Other – Other type of health facility  Unknown – Unknown type of facility | | | |
| **Type** | | Type of operation – Public, private, or mixed | | PUB – Public operation  PRI – Private operation  MIX – Mixed operation  COM – Community  INGO – International Non-Governmental Organization (NGO)  Local NGO  IFBO – International Faith-Based Organization (FBO)  Local FBO  UNI – University  MIL – Military  <null> – No information | | | |
| **Constructn** | | Type of construction | | Examples:  Reinforced Concrete  Unreinforced masonry  Wood frame  Adobe | | | |
| **Damage** | | Level of damage | | Damaged  Completely destroyed  Severe  Moderate  None  (If blank, undetermined) | | | |
| **Variable** | | Description | | **Value Description** | | | |
|  | | **Facility Info continued** | | |  | | |
| **DateDamage** | | Date of damage assessment | |  | | | |
| **Operational Status** | | Level of operational status | | Operational  No surgical capacity  Field Hospital  Field Hospital co-located with Hospital  (If blank, undetermined) | | | |
|  | | **Data Sources** | |  | | | |
| **SourceHosp** | | Source of hospital/coordinates | | Examples:  ME/MSPP2010: Measure Evaluation/MSPP 2010  2009 MSPP database  2005 MSPP database with Geocodes  PEPFAR  Sahana Foundation  WHO  Ushahidi  UN/MINUSTAH | | | |
| **SourceDamage** | | Date of damage assessment | |  | | | |
| **SourceOpStatus** | | Source of level of operational status | |  | | | |
| **DateOpStatus** | | Date of operational status assessment | |  | | | |
|  | | **Duplicates** | |  | | | |
| **AlternateCoord** | | Coordinates of alternate facilities provided in the dataset upon de-depublication and source of these coordinates | |  | | | |
| **AlternateHealth**  **CIDDeleted** | | HealthCIDs of alternate facilities provided in the dataset upon de-duplication that were deleted | |  | | | |
| **Variable** | | Description | | **Value Description** | | | |
| **Other** | | | | | | | |
| **NUM** | | This value equals the internal FID Value | | |  |
| **Telephone** | | Telephone number to contact facility | | |  |
| **FAX** | | Fax number of facility | | |  |
| **E-mail** | | Email address for facility | | |  |
| **Comment** | | Add additional information | | | Extra information found in duplicate records is mentioned here. |
